# Supplementary material for: A reflective millimeter-wave photonic limiter
Source: PubMed Central journal article supplement — Sci Adv. 2022 Jan 14;8(2):eabh1827. doi: 10.1126/sciadv.abh1827 (PMC8759749; doi:10.1126/sciadv.abh1827), 2022-01-14
Supplement: sciadv.abh1827_sm.pdf [file sciadv.abh1827_sm.pdf]

Supplementary Materials for  
**A reflective millimeter-wave photonic limiter**

Rodion Kononchuk, Suwun Suwunnarat, Martin S. Hilario, Anthony E. Baros, Brad W. Hoff,  
Vladimir Vasilyev, Ilya Vitebskiy, Tsampikos Kottos, Andrey A. Chabanov\*

\*Corresponding author. Email: andrey.chabanov@utsa.edu

Published 14 January 2022, *Sci. Adv.* **8**, eabh1827 (2022)  
DOI: 10.1126/sciadv.abh1827

**The PDF file includes:**

Figs. S1 to S4  
Table S1  
Legends for movies S1 and S2  
References

**Other Supplementary Material for this manuscript includes the following:**

Movies S1 and S2

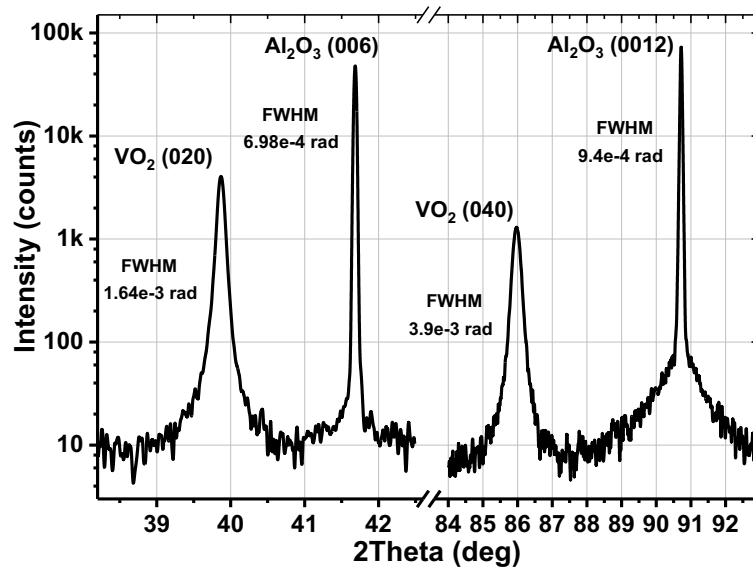

**Fig. S1. X-ray diffractometry of the  $\text{VO}_2$  film.**

Room-temperature XRD plot of the ~150 nm thick  $\text{VO}_2$  film deposited on sapphire substrate. The presence of highly oriented monoclinic  $\text{VO}_2$  crystalline phase is indicated by the characteristic peaks (020) and (040) at 39.87° and 85.97°, respectively.

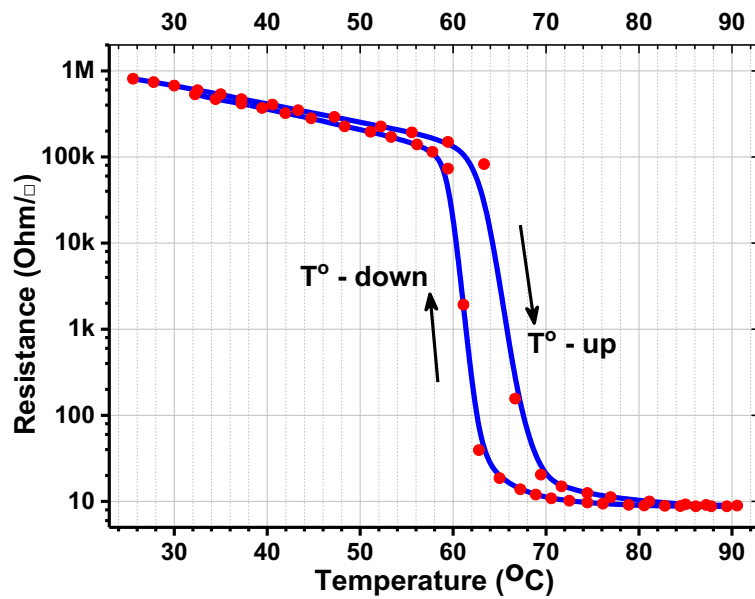

**Fig. S2. Electrical properties of the VO<sub>2</sub> film.**

Sheet resistance of the ~150 nm thick VO<sub>2</sub> film on sapphire substrate vs. temperature for the thermal cycle in a range from 20°C to 95°C. The abrupt change in the magnitude and hysteresis of the sheet resistance indicate the insulator-to-metal transition on the VO<sub>2</sub> film. The red dots are data points; the solid blue line is included for eye guidance.

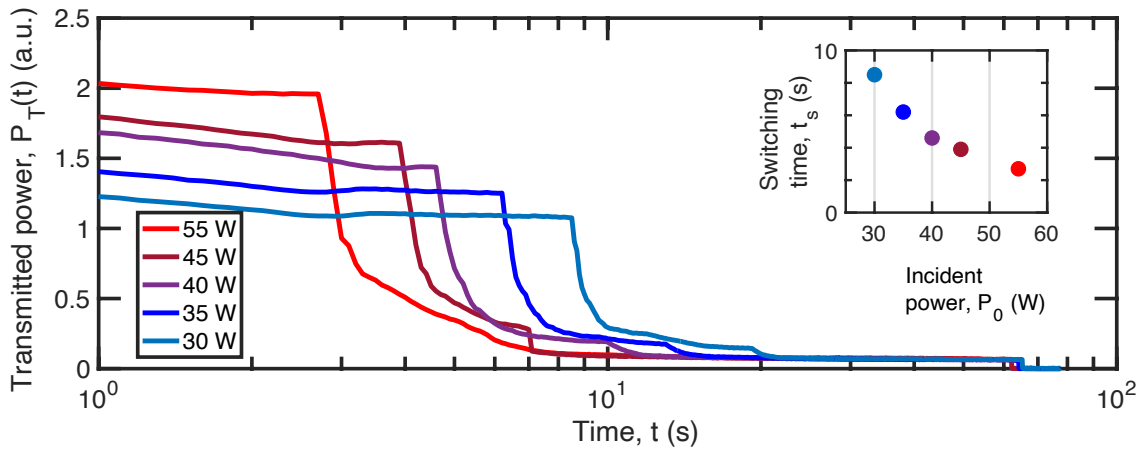

**Fig. S3. High-power mm-wave measurements of the photonic limiter.**

Time-varying transmitted power  $P_T(t)$  of the photonic limiter (in arb. units) following excitation by a CW 95-GHz Gaussian beam of input powers  $P_0 = 30, 35, 40, 45,$  and  $55$  W, exiting the limiter via a 19-mm diameter metallic aperture. As compared to the measurements without the aperture in Fig. 4, the limiter has a sharper drop in transmitted power and a shorter switching time due to partial reflection from the aperture. Inset: switching time  $t_s$ , corresponding to the onset of the metallic phase in the  $\text{VO}_2$  layer, versus the input power  $P_0$ .

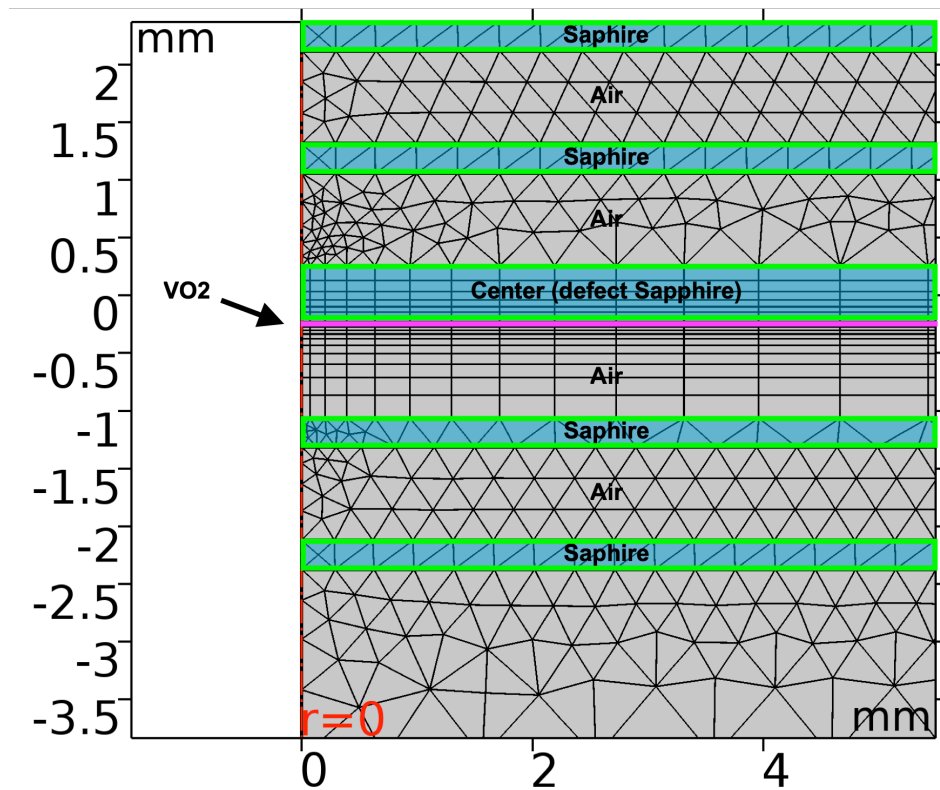

**Fig. S4. COMSOL simulation mesh.**

The varying mesh density used in the COMSOL simulations of the mm-wave limiter.

| Material          | Mass density, $\rho$ (kg/m <sup>3</sup> ) | Thermal conductivity, $k$ (W/m·K) | Heat capacity, $c$ (J/kg·K) |
|-------------------|-------------------------------------------|-----------------------------------|-----------------------------|
| Sapphire          | 3980 [47]                                 | 20 [47]                           | 756 [47]                    |
| Air, 1 atm, 298 K | 1.184 [48]                                | 0.026 [48]                        | 1004 [48]                   |
| VO <sub>2</sub>   | 4031 [49]                                 | 6.5 [50]                          | 656 [50]                    |

**Table S1. Material properties**

Thermal and physical properties of the materials used in the heat transfer modeling of the mm-wave limiter.

**Movie S1.**

Heating of the VO<sub>2</sub> layer inside the photonic limiter following excitation by a CW 95-GHz Gaussian beam of input power  $P_0 = 45$  W, captured with a FLIR infrared thermal camera. The metallic phase of the VO<sub>2</sub> layer manifests itself as the red spot in the center, where the beam intensity is maximum. At the end, when the input power is turned off, the VO<sub>2</sub> reverts from the metallic to the dielectric phase after a brief delay.

**Movie S2.**

COMSOL simulated propagation of a CW 95-GHz Gaussian beam of input power  $P_0 = 554$  W through the multilayer of Fig. 1. The metallic phase of the VO<sub>2</sub> layer, which occurs and blocks the beam in the center, is seen to grow in diameter with time following the excitation until reaching equilibrium.

## REFERENCES AND NOTES

1. T. S. Rappaport, S. Sun, R. Mayzus, H. Zhao, Y. Azar, K. Wang, G. N. Wong, J. K. Schulz, M. Samimi, F. Gutierrez Jr., Millimeter wave mobile communications for 5g cellular: It will work! *IEEE Access* **1**, 335–349 (2013).
2. J. G. Andrews, S. Buzzi, W. Choi, S. V. Hanly, A. Lozano, A. C. K. Soong, J. C. Zhang, What will 5G be? *IEEE J. Sel. Areas Commun.* **32**, 1065–1082 (2014).
3. L. Yujiri, M. Shoucri, P. Moffa, Passive millimeter wave imaging. *IEEE Microw. Mag.* **4**, 39–50 (2003).
4. J. C. K. Wells, *Multigigabit Microwave and Millimeter-Wave Wireless Communications* (Artech House Publishers, 2010).
5. C. Iovescu, S. Rao, The fundamentals of millimeter-wave sensors. (Publication SPYY005, Texas Instruments, 2017); [www.mouser.ee/pdfdocs/mmwavewhitepaper.pdf](http://www.mouser.ee/pdfdocs/mmwavewhitepaper.pdf).
6. W. A. Radasky, C. E. Baum, M. W. Wik, Introduction to the special issue on high-power electromagnetics (HPEM) and intentional electromagnetic interference (IEMI), *IEEE Trans. Electromagn. Compat.* **46**, 314–321 (2004).
7. M. G. Backstrom, K. G. Lovstrand, Susceptibility of electronic systems to high-power microwaves: Summary of test experience, *IEEE Trans. Electromagn. Compat.* **46**, 396–403 (2004).
8. R. Hsu, A. Ayazi, B. Houshmand, B. Jalali, All-dielectric photonic-assisted radio front-end technology. *Nat. Photonics.* **1**, 535–538 (2007).
9. J. Benford, J. A. Swegle, E. Schamiloglu, *High Power Microwaves* (Taylor & Francis, ed. 2, 2007).
10. E. Schamiloglu, High power microwave sources and applications, in *Proceedings of the IEEE MTT-S International Microwave Symposium Digest* (Jun. 2004), vol. 2, pp. 1001–1004.
11. R. Cory, *PIN-Limiter Diodes Effectively Protect Receivers* (EDN Magazine, 17 December, 2004), pp. 50–64.
12. K. Gong, H. Feng, R. Zhan, A. Z. H. Wang, A study of parasitic effects of ESD protection on RF ICs. *IEEE Trans. Microw. Theory Techn.* **50**, 393–402 (2002).
13. R. W. Heath, N. González-Prelcic, S. Rangan, W. Roh, A. M. Sayeed, An overview of signal processing techniques for millimeter wave MIMO systems. *IEEE J. Sel. Top. Signal Process.* **10**, 436–453 (2016).
14. A. Hirata, H. Harada, T. Nagatsuma, 120-GHz wireless link using photonic techniques for generation, modulation, and emission of millimeter-wave signals. *J. Light. Technol.* **21**, 2145–2153 (2003).
15. J. McKinney, Photonics illuminates the future of radar. *Nature* **507**, 310–312 (2014).



16. P. Ghelfi, F. Laghezza, F. Scotti, G. Serafino, A. Capria, S. Pinna, D. Onori, C. Porzi, M. Scaffardi, A. Malacarne, V. Vercesi, E. Lazzeri, F. Berizzi, A. Bogoni, A fully photonics-based coherent radar system. *Nature* **507**, 341–345 (2014).
17. X. Zou, B. Lu, W. Pan, L. Yan, A. Stöhr, J. Yao, Photonics for microwave measurements. *Laser Photonics Rev.* **10**, 711–734 (2016).
18. X. Xie, R. Bouchand, D. Nicolodi, M. Giunta, W. Hänsel, M. Lezius, A. Joshi, S. Datta, C. Alexandre, M. Lours, P.-A. Tremblin, G. Santarelli, R. Holzwarth, Y. L. Coq, Photonic microwave signals with zeptosecond-level absolute timing noise. *Nat. Photonics* **11**, 44–47 (2017).
19. D. G. Georgiadou, J. Semple, A. A. Sagade, H. Forstén, P. Rantakari, Y.-H. Lin, F. Alkhalil, A. Seitkhan, K. Loganathan, H. Faber, T. D. Anthopoulos, 100 GHz zinc oxide Schottky diodes processed from solution on a wafer scale. *Nat. Electron.* **3**, 718–725 (2020).
20. L. W. Tutt, T. F. Boggess, A review of optical limiting mechanisms and devices using organics, fullerenes, semiconductors and other materials. *Prog. Quantum. Electron.* **17**, 299–338 (1993).
21. M. J. Miller, A. G. Mott, B. P. Ketchel, General optical limiting requirements. *Proc. SPIE* **3472**, 24–29 (1998).
22. E. W. Van Stryland, Y. Y. Wu, D. J. Hagan, M. J. Soileau, K. Mansour, Optical limiting with semiconductors. *J. Opt. Soc. Am. B* **5**, 1980–1988 (1988).
23. L. W. Tutt, A. Kost, Optical limiting performance of C<sub>60</sub> and C<sub>70</sub> solutions. *Nature* **356**, 225–226 (1992).
24. P. Chen, X. Wu, X. Sun, J. Lin, W. Ji, K. L. Tan, Electronic structure and optical limiting behavior of carbon nanotubes. *Phys. Rev. Lett.* **82**, 2548 (1999), 2551.
25. T. Boggess, A. Smirl, S. Moss, I. Boyd, E. Van Stryland, Optical limiting in GaAs. *IEEE J. Quantum Electron.* **21**, 488–494 (1985).
26. E. Makri, H. Ramezani, T. Kottos, I. Vitebskiy, Concept of a reflective power limiter based on nonlinear localized modes. *Phys. Rev. A* **89**, 031802 (2014).
27. E. Makri, T. Kottos, I. Vitebskiy, Reflective optical limiter based on resonant transmission. *Phys. Rev. A* **91**, 043838 (2015).
28. J. H. Vella, J. H. Goldsmith, A. T. Browning, N. I. Limberopoulos, I. Vitebskiy, E. Makri, T. Kottos, Experimental realization of a reflective optical limiter. *Phys. Rev. Appl.* **5**, 064010 (2016).
29. S. Suwunnarat, R. Kononchuk, A. Chabanov, I. Vitebskiy, N. I. Limberopoulos, T. Kottos, Enhanced nonlinear instabilities in photonic circuits with exceptional point degeneracies. *Photonics Res.* **8**, 737–744 (2020).

30. R. Thomas, A. A. Chabanov, I. Vitebskiy, T. Kottos, Light-induced optical switching in an asymmetric metal-dielectric microcavity with phase-change material. *EPL* **126**, 64003 (2019).
31. N. Antonellis, R. Thomas, M. A. Kats, I. Vitebskiy, T. Kottos, Nonreciprocity in photonic structures with phase-change components. *Phys. Rev. Appl.* **11**, 024046 (2019).
32. S. D. Ha, Y. Zhou, A. E. Duwel, D. W. White, S. Ramanathan, Quick switch: Strongly correlated electronic phase transition systems for cutting-edge microwave devices. *IEEE Microw. Mag.* **15**, 32–44 (2014).
33. J. Givernaud, A. Crunteanu, J.-C. Orlianges, A. Pothier, C. Champeaux, A. Catherinot, P. Blondy, Microwave power limiting devices based on the semiconductor-metal transition in vanadium-dioxide thin films. *IEEE Trans. Microw. Theory Tech.* **58**, 2352–2361 (2010).
34. U. K. Chettiar, N. Engheta, Modeling vanadium dioxide phase transition due to continuous-wave optical signals. *Opt. Express* **23**, 445–451 (2015).
35. C. Wan, E. H. Horak, J. King, J. Salman, Z. Zhang, Y. Zhou, P. Roney, B. Gundlach, S. Ramanathan, R. H. Goldsmith, M. A. Kats, Limiting optical diodes enabled by the phase transition of vanadium dioxide. *ACS Photonics* **5**, 2688–2692 (2018).
36. J. Rozen, R. Lopez, R. F. Haglund, L. C. Feldman, Two-dimensional current percolation in nanocrystalline vanadium dioxide films. *Appl. Phys. Lett.* **88**, 081902 (2006).
37. M. M. Qazilbash, M. Brehm, B.-G. Chae, P.-C. Ho, G. O. Andreev, B.-J. Kim, S. J. Yun, A. V. Balatsky, M. B. Maple, F. Keilmann, H.-T. Kim, D. N. Basov, Mott transition in VO<sub>2</sub> revealed by infrared spectroscopy and nano-imaging. *Science* **318**, 1750–1753 (2007).
38. P. J. Hood, J. F. DeNatale, Millimeter-wave dielectric properties of epitaxial vanadium dioxide thin films. *J. Appl. Phys.* **70**, 376–381 (1991).
39. P. Yeh, *Optical Waves in Layered Media* (Wiley, 1988).
40. J. H. Whitelaw, Convective heat transfer (Thermopedia, 2011); <http://thermopedia.com/content/660/>.
41. *COMSOL Multiphysics Model Library* (COMSOL AB, v.5.2, 2015).
42. T. L. Bergman, A. S. Lavine, F. P. Incropera, D. P. Dewitt, *Fundamentals of Heat and Mass Transfer* (Wiley, ed. 7, 2011).
43. L. Kong, Z. Li, L. Liu, R. Huang, M. Abshinova, Z. Yang, C. B. Tang, P. Tan, C. Deng, S. Matitsine, Recent progress in some composite materials and structures for specific electromagnetic applications. *Int. Mater. Rev.* **58**, 203–259 (2013).
44. H. Kim, N. Charipar, M. Osofsky, S. B. Qadri, A. Piqué, Optimization of the semiconductor-metal transition in VO<sub>2</sub> epitaxial thin films as a function of oxygen growth pressure. *Appl. Phys. Lett.* **104**, 081913 (2014).

45. A. J. Littlejohn, Y. Yang, Z. Lu, E. Shin, K. C. Pan, G. Subramanyam, V. Vasilyev, K. Leedy, T. Quach, T.-M. Lu, G.-C. Wang, Naturally formed ultrathin  $V_2O_5$  heteroepitaxial layer on  $VO_2$  /sapphire (001) film. *Appl. Surf. Sci.* **419**, 365–372 (2017).
46. M. S. Hilario, B. W. Hoff, B. Jawdat, M. T. Lanagan, Z. W. Cohick, F. W. Dynys, J. A. Mackey, J. M. Gaone,  $W$ -band complex permittivity measurements at high temperature using free-space methods. *IEEE Trans. Compon. Packaging Manuf. Technol.* **9**, 1011–1019 (2019).
47. Valley Design Corp. Properties of sapphire wafers and substrates. (Valley Design Corp., 2015); <http://valleydesign.com/sappprop.htm>.
48. Y. S. Touloukian, P. E. Liley, S. C. Saxena, *Thermophysical Properties of Matter - The TPRC Data series. Vol. 3. Thermal Conductivity - Nonmetallic Liquids and Gases* (Defense Technical Information Center, 1970).
49. C. Leroux, G. Nihoul, G. Van Tendeloo, From  $VO_2(B)$  to  $VO_2(R)$ : Theoretical structures of  $VO_2$  polymorphs and in situ electron microscopy. *Phys. Rev. B* **57**, 5111–5121 (1998).
50. C. N. Berglund, H. J. Guggenheim, Electronic properties of  $VO_2$  near the semiconductor-metal transition. *Phys. Rev.* **185**, 1022 (1969), 1033.
